# Supplementary material for: Physiological and Biochemical Responses of Pseudocereals with C3 and C4 Photosynthetic Metabolism in an Environment with Elevated CO2
Source: MDPI journal article supplement (doi:10.3390/plants13233453), 2024-12-09
Supplement: s1 [file s1]

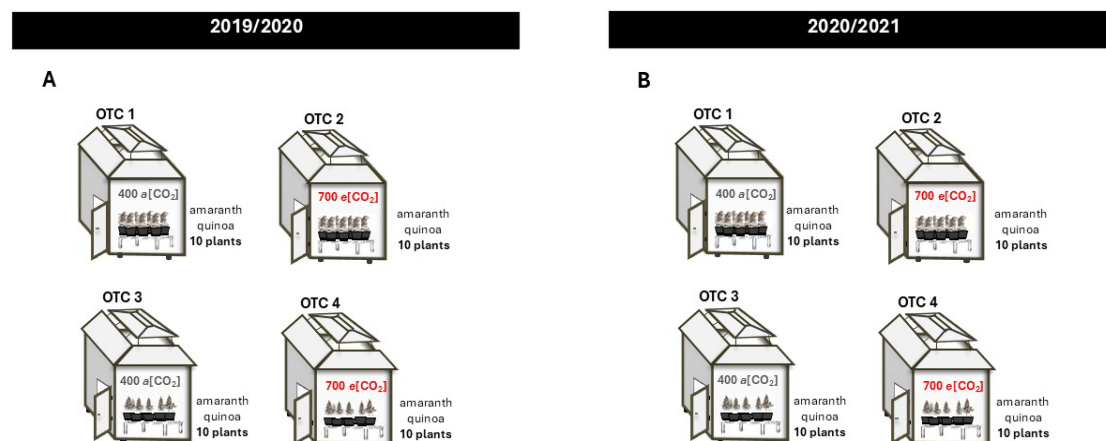

**Supplementary figure 1.** Experimental setup to  $a[CO_2]$  versus  $e[CO_2]$  studies in amaranth and quinoa plants to two agricultural years, 2019/2020 (A) and 2020/2021(B).

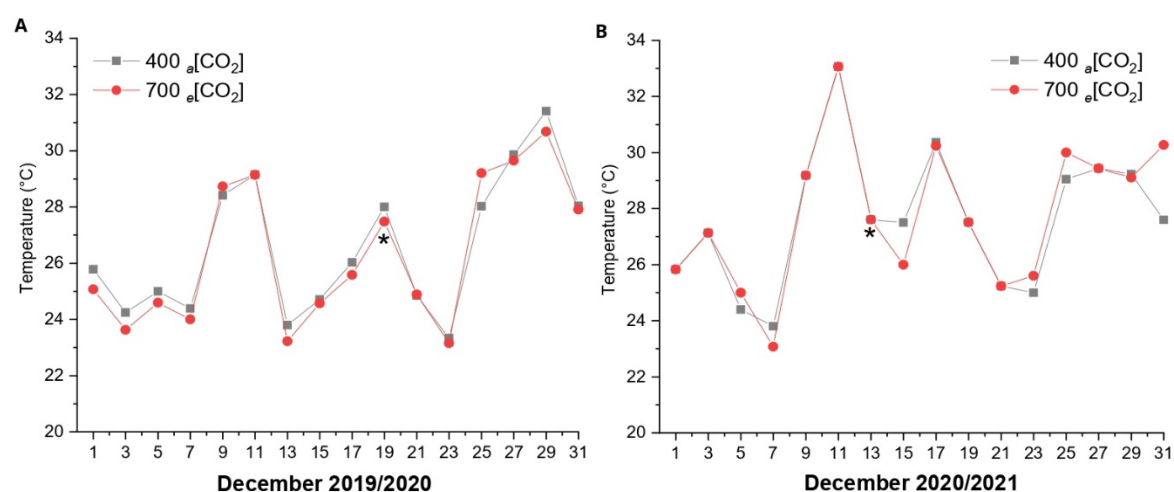

**Supplementary figure 2.** Daily mean temperature inside the OTCs during 2019/2020 (A), and 2020/2021 (B). \*Transition period between vegetative and flowering .
